# Supplementary material for: RNA-seq in DMD urinary stem cells recognized muscle-related transcription signatures and addressed the identification of atypical mutations by whole-genome sequencing
Source: PubMed Central journal article supplement — HGG Adv. 2021 Aug 24;3(1):100054. doi: 10.1016/j.xhgg.2021.100054 (PMC8756543; doi:10.1016/j.xhgg.2021.100054), 2021-08-24
Supplement: mmc1.pdf [file mmc1.pdf]

**Supplemental information**

**RNA-seq in DMD urinary stem cells recognized muscle-related transcription signatures and addressed the identification of atypical mutations by whole-genome sequencing**

**Maria S. Falzarano, Andrea Grilli, Silvia Zia, Mingyan Fang, Rachele Rossi, Francesca Gualandi, Paola Rimessi, Reem El Dani, Marina Fabris, Zhiyuan Lu, Wenyan Li, Tiziana Mongini, Federica Ricci, Elena Pegoraro, Luca Bello, Andrea Barp, Valeria A. Sansone, Madhuri Hegde, Barbara Roda, Pierluigi Reschiglian, Silvio Bicciato, Rita Selvatici, and Alessandra Ferlini**

## **Supplemental Methods**

### **Celector® technology**

The cell separation exploits the Non-Equilibrium, Earth Gravity Assisted Fractionation (NEEGA-DF) principles where cells are separated and eluted based only on their physical characteristics such as dimension, density, morphology, and membrane rigidity. In general, these characteristics influence the cell position across the capillary device, generated by the opposite forces acting on cells, gravity, and lift forces. Cells having different positions possess different velocity and therefore elute at different times, allowing the separation and collection of several subpopulations. A camera with a microscopic object placed at the outlet of the capillary channel and connected to imaging software records live images of eluting cells and plots the number of counted cells related to elution time in a fractogram (profile). Dimension inclusion/exclusion criteria are set by the operator to refine the counting procedure. A decontamination procedure of the fractionation system by flushing a cleaning solution of sterile, demineralized water is performed every day before starting. Subsequently, to block unspecific interaction sites on the plastic walls, a sterile coating solution is flushed at 1 ml/min. The system is then ready to be used after filling it with sterile mobile phase. All solutions are provided by Stem Sel s.r.l. (Italy).

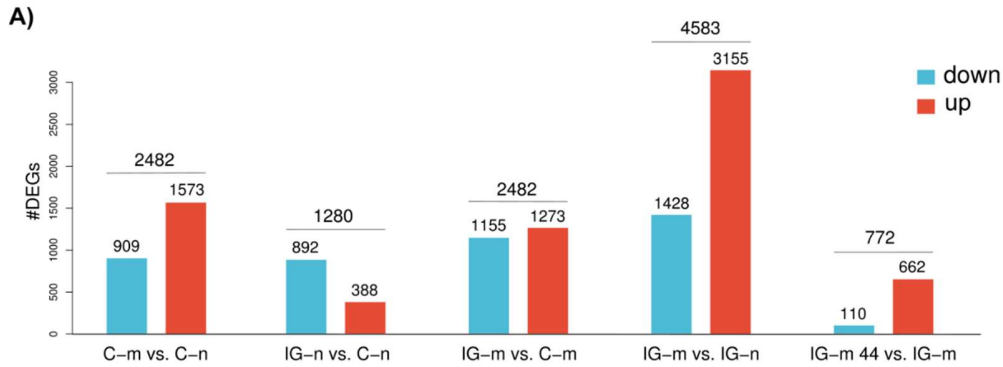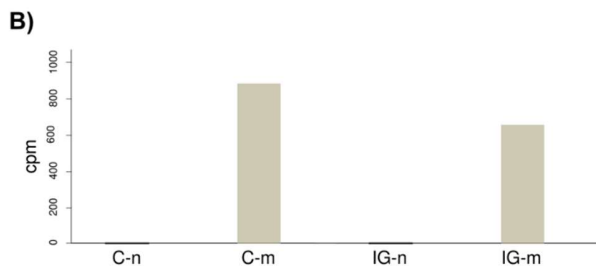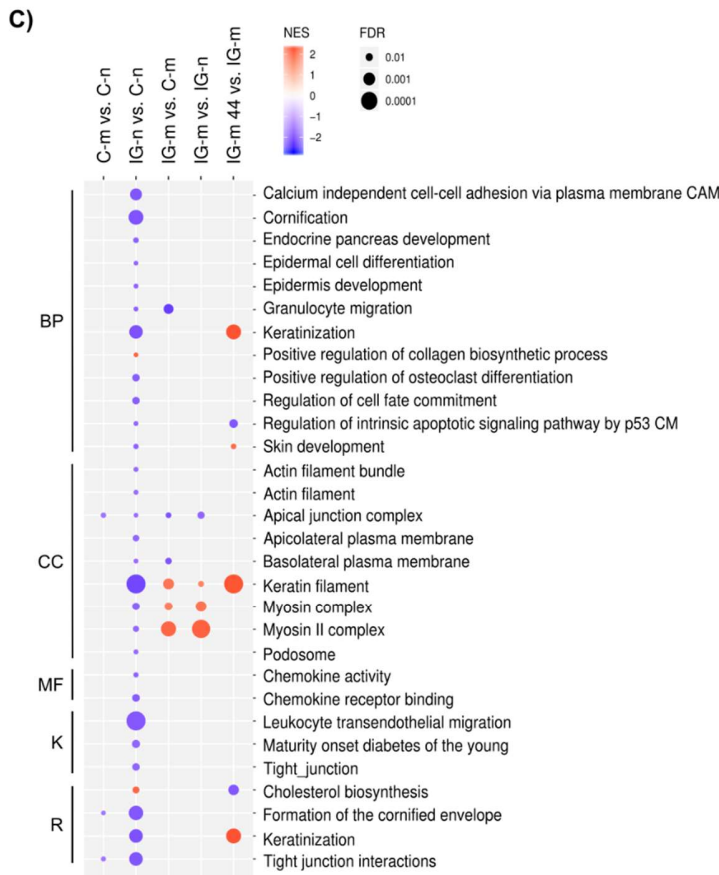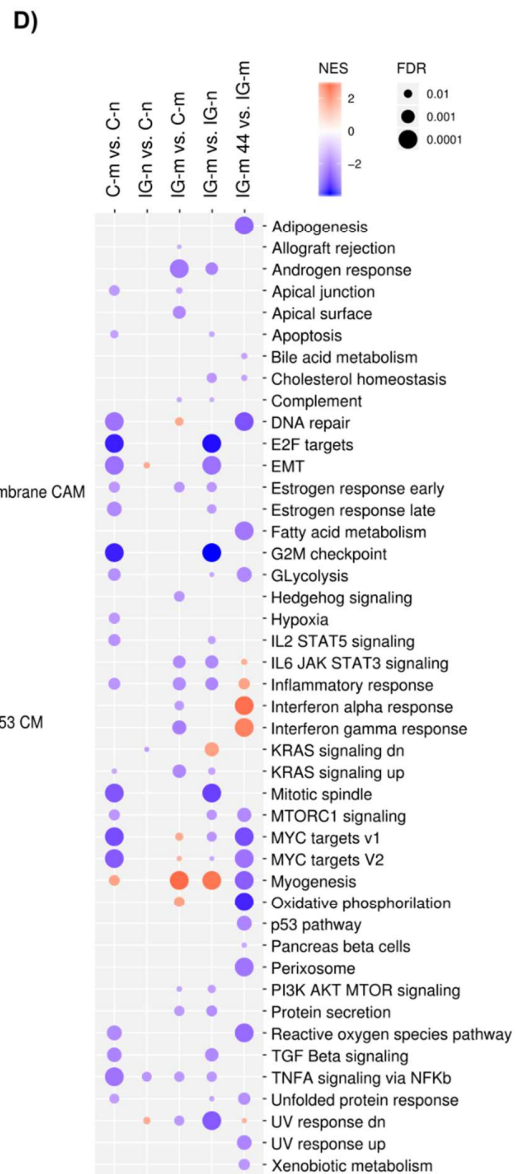

**Supplementary Fig. 1.** A) Number of genes differentially expressed in native (*n*) and myogenic (*m*) USCs from DMD (IG) or controls (C) and following AON treatment (44). B) MYOD gene expression in native and MyoD-induced USCs. C) Enrichment analysis highlighted the downregulation of gene sets mainly involved in the inflammatory response and in skin-related circuits in IG-*n* compared to C-*n* USCs. The plot shows a manual selection of gene sets from different collections of the MsigDB database. BP: Gene ontology, biological processes; CC: Gene ontology, cellular component; MF: Gene ontology, molecular function; K: KEGG gene set; R: Reactome gene set. NES: normalized enrichment score. Red, positive NES, i.e., activation of the gene set in the first condition; Blue, negative NES, i.e., repression of the gene set in the first condition; FDR: p-value after false discovery rate correction. Only significantly ( $FDR \leq 0.05$ ) enriched gene sets are shown. Abbreviations in the gene set labels: CAM: cell adhesion molecules; CM: class mediator. D) Enrichment analysis using the gene sets from the Hallmark collection of MsigDB. The MyoD treatment induced a significant deregulation of both inflammatory and myogenesis pathways in healthy donors and patients' native USCs. Both signaling pathways are reverted after AON transfection. Figure legend as in panel C.

**Table S1.** Total number of reads and number of reads for each main step of RNA-seq analysis for all analyzed samples.

| <b>Sample ID</b> | <b>raw fastq</b> | <b>trimmed</b> | <b>aligned:<br/>uniquely mapped</b> | <b>counted:<br/>assigned to coding<br/>regions</b> |
|------------------|------------------|----------------|-------------------------------------|----------------------------------------------------|
| <b>C-m</b>       | 20,600,102       | 20,065,900     | 18,135,177                          | 15,567,734                                         |
| <b>C-n</b>       | 59,505,396       | 31,751,714     | 30,011,295                          | 26,706,107                                         |
| <b>IG-n</b>      | 32,956,669       | 22,756,422     | 21,872,447                          | 19,532,133                                         |
| <b>IG-m 44</b>   | 15,033,477       | 14,806,346     | 13,831,392                          | 9,023,157                                          |
| <b>IG-m</b>      | 31,431,592       | 19,914,094     | 16,951,806                          | 14,547,339                                         |

**Table S2.** Genes of different myogenic pathways deregulated by *MYOD* gene expression in USCs from both control and DMD IG as compared to their native counterparts (up-regulated genes in red; down-regulated genes in green; FDR≤0.05).

| Gene symbol                       | Function (gene description)                  | C- <i>m</i> vs. C- <i>n</i> |          | IG- <i>m</i> vs. IG- <i>n</i> |          |
|-----------------------------------|----------------------------------------------|-----------------------------|----------|-------------------------------|----------|
|                                   |                                              | logFC                       | FDR      | logFC                         | FDR      |
| <b>CDH15</b>                      | cadherin 15                                  | 10.98                       | 1.18E-12 | 12.65                         | 3.66E-17 |
| <b>TNS4</b>                       | tensin 4                                     | -11.30                      | 9.90E-08 | -8.68                         | 2.17E-04 |
| <b>Cell Cycle/DNA Replication</b> |                                              |                             |          |                               |          |
| <b>GADD45G</b>                    | Gadd45g                                      | 2.90                        | 2.26E-02 | 7.10                          | 1.49E-08 |
| <b>BRCA1</b>                      | breast cancer 1                              | -3.99                       | 8.46E-04 | -7.02                         | 1.11E-07 |
| <b>TACC3</b>                      | Tacc3                                        | -3.03                       | 1.10E-02 | -3.19                         | 4.21E-03 |
| <b>CDK2</b>                       | cyclin-dependent kinase 2                    | -3.50                       | 3.42E-03 | -3.22                         | 4.35E-03 |
| <b>MKI67</b>                      | Ki 67                                        | -11.07                      | 1.18E-12 | -7.28                         | 4.95E-09 |
| <b>BUB1B</b>                      | Bub1b                                        | -2.83                       | 1.94E-02 | -6.51                         | 1.54E-07 |
| <b>Growth Factors/Ligands</b>     |                                              |                             |          |                               |          |
| <b>PDGFA</b>                      | platelet derived growth factor a             | 2.62                        | 3.14E-02 | 3.55                          | 1.55E-03 |
| <b>TGFBI</b>                      | transforming growth factor b                 | -2.60                       | 3.19E-02 | -5.04                         | 1.03E-05 |
| <b>IGFBP5</b>                     | insulin-like growth factor binding protein 5 | 3.02                        | 1.10E-02 | 3.52                          | 1.59E-03 |
| <b>Metabolism</b>                 |                                              |                             |          |                               |          |
| <b>GPC1</b>                       | glypican 1                                   | 2.53                        | 3.74E-02 | 3.64                          | 1.06E-03 |
| <b>Nuclear Regulatory Factors</b> |                                              |                             |          |                               |          |
| <b>EYA1</b>                       | eyes absent 1                                | 5.24                        | 7.40E-05 | 4.60                          | 2.31E-03 |
| <b>MYOG</b>                       | Myogenin                                     | 7.02                        | 3.50E-02 | 12.61                         | 2.72E-14 |
| <b>Receptors/Signaling</b>        |                                              |                             |          |                               |          |
| <b>RYR1</b>                       | ryanodine receptor 1                         | 6.52                        | 2.92E-07 | 11.88                         | 4.07E-15 |
| <b>RAPSN</b>                      | receptor-associated prot                     | 5.12                        | 6.41E-05 | 8.24                          | 1.45E-09 |
| <b>CHRNB1</b>                     | cholinergic receptor nicotinic b1            | 3.54                        | 2.60E-03 | 4.47                          | 7.59E-05 |
| <b>RAB9B</b>                      | Rab9                                         | 2.89                        | 1.89E-02 | 2.84                          | 1.94E-02 |
| <b>CHRNG</b>                      | cholinergic receptor, nicotinic g            | 4.34                        | 3.83E-03 | 8.44                          | 2.08E-09 |
| <b>ITGA7</b>                      | integrin alpha 7                             | 6.43                        | 2.83E-07 | 6.50                          | 5.66E-08 |
| <b>VIPR2</b>                      | vip receptor 2                               | 5.26                        | 3.73E-04 | 8.25                          | 8.41E-04 |
| <b>EGFR</b>                       | epidermal growth factor receptor             | -2.45                       | 4.55E-02 | -5.77                         | 1.07E-06 |
| <b>ADCY7</b>                      | adenylate cyclase 7                          | -2.69                       | 2.78E-02 | -2.77                         | 1.41E-02 |
| <b>Structural/Cytoskeletal</b>    |                                              |                             |          |                               |          |
| <b>TNNI1</b>                      | troponin I, skeletal, slow 1                 | 6.88                        | 1.45E-05 | 11.05                         | 2.64E-17 |
| <b>NES</b>                        | nestin                                       | 9.48                        | 6.44E-12 | 3.90                          | 4.68E-04 |
| <b>MYBPH</b>                      | myosin-binding protein H                     | 7.91                        | 6.00E-07 | 9.02                          | 9.98E-12 |
| <b>TNNT2</b>                      | troponin T2, cardiac                         | 10.01                       | 6.44E-12 | 10.24                         | 7.00E-14 |
| <b>KIF4A</b>                      | kinesin heavy chain member                   | -13.09                      | 2.37E-10 | -6.10                         | 6.82E-07 |
| <b>LMNB2</b>                      | lamin B2                                     | -3.12                       | 8.39E-03 | -2.96                         | 7.76E-03 |

**Table S3.** Genes belonging to the core enrichment genes of the Hallmark myogenesis gene set were deregulated in myogenic DMD USC<sub>s</sub> as compared to control. The upregulation in DMD myogenic USC<sub>s</sub> (IG-*m*) as compared to control cells (C-*m*; FDR $\leq$ 0.05 and Fold Change $\geq$ 2) is reverted by the treatment of IG-*m* cells with AON44.

| geneSymbol | IG- <i>m</i> .vs.C- <i>m</i> |          | IG- <i>m</i> 44.vs.IG- <i>m</i> |          |
|------------|------------------------------|----------|---------------------------------|----------|
|            | logFC                        | FDR      | logFC                           | FDR      |
| ACHE       | 3.68                         | 2.17E-03 | -0.71                           | 7.06E-01 |
| ACTA1      | 5.14                         | 1.93E-05 | -2.47                           | 7.48E-02 |
| ACTC1      | 4.59                         | 1.12E-04 | -1.11                           | 4.99E-01 |
| ACTN2      | 4.87                         | 5.22E-05 | -0.70                           | 7.06E-01 |
| ACTN3      | 7.41                         | 4.21E-08 | -1.84                           | 1.98E-01 |
| AEBP1      | 3.03                         | 1.20E-02 | -0.86                           | 6.25E-01 |
| AK1        | 4.27                         | 3.52E-04 | -2.57                           | 6.63E-02 |
| APOD       | 9.14                         | 1.20E-04 | -1.83                           | 2.57E-01 |
| ATP2A1     | 4.06                         | 6.10E-04 | -1.15                           | 4.81E-01 |
| CACNG1     | 10.33                        | 2.93E-06 | -1.41                           | 3.83E-01 |
| CAV3       | 7.98                         | 1.13E-08 | -2.21                           | 1.10E-01 |
| CFD        | 3.34                         | 2.30E-02 | -0.92                           | 6.75E-01 |
| CKM        | 8.01                         | 2.59E-09 | -1.83                           | 1.98E-01 |
| COX6A2     | 3.53                         | 3.36E-03 | -2.59                           | 6.62E-02 |
| COX7A1     | 7.23                         | 7.56E-08 | -2.69                           | 5.84E-02 |
| CRYAB      | 2.74                         | 2.41E-02 | -1.70                           | 2.44E-01 |
| CSRP3      | 4.09                         | 6.04E-04 | -1.58                           | 2.92E-01 |
| DES        | 3.87                         | 1.02E-03 | -2.04                           | 1.44E-01 |
| EFS        | 9.87                         | 1.24E-05 | -0.54                           | 8.08E-01 |
| ENO3       | 4.76                         | 6.66E-05 | -2.25                           | 1.05E-01 |
| FOXO4      | 2.80                         | 2.28E-02 | -0.22                           | 9.41E-01 |
| FST        | 2.78                         | 2.20E-02 | -1.22                           | 4.46E-01 |
| GADD45B    | 2.82                         | 2.39E-02 | -0.49                           | 8.16E-01 |
| GJA5       | 5.34                         | 4.42E-03 | -1.08                           | 5.81E-01 |
| GPX3       | 3.43                         | 3.95E-03 | -1.27                           | 4.23E-01 |
| GSN        | 3.60                         | 2.57E-03 | -2.09                           | 1.34E-01 |
| HRC        | 9.52                         | 3.99E-11 | -1.61                           | 2.75E-01 |
| HSPB2      | 5.50                         | 9.41E-06 | -1.90                           | 1.82E-01 |
| ITGA7      | 2.52                         | 3.91E-02 | -0.80                           | 6.56E-01 |
| KCNH2      | 3.60                         | 2.61E-03 | -0.84                           | 6.34E-01 |
| LSP1       | 6.71                         | 1.21E-05 | -1.04                           | 5.59E-01 |
| MAPRE3     | 2.52                         | 4.61E-02 | -0.94                           | 5.93E-01 |
| MB         | 5.69                         | 1.81E-05 | -1.89                           | 1.96E-01 |
| MYBPH      | 5.95                         | 1.50E-06 | -1.32                           | 3.92E-01 |
| MYF6       | 10.70                        | 9.09E-07 | -1.43                           | 3.81E-01 |
| MYH2       | 11.30                        | 1.39E-07 | -0.29                           | 9.10E-01 |
| MYH3       | 9.23                         | 4.41E-11 | -0.99                           | 5.60E-01 |
| MYH7       | 7.74                         | 2.94E-06 | -0.91                           | 6.16E-01 |
| MYH8       | 17.08                        | 1.02E-16 | -0.40                           | 8.57E-01 |
| MYL1       | 6.61                         | 1.78E-07 | -1.58                           | 2.86E-01 |
| MYL3       | 3.89                         | 1.06E-03 | -2.84                           | 4.53E-02 |

|               |       |          |       |          |
|---------------|-------|----------|-------|----------|
| <b>MYL4</b>   | 6.55  | 2.21E-07 | -2.12 | 1.27E-01 |
| <b>MYL6B</b>  | 3.69  | 1.79E-03 | -2.43 | 8.32E-02 |
| <b>MYL7</b>   | 5.88  | 1.93E-05 | -2.31 | 1.10E-01 |
| <b>MYLPF</b>  | 11.28 | 2.00E-14 | -2.48 | 7.45E-02 |
| <b>MYOG</b>   | 8.86  | 3.69E-10 | -0.94 | 5.83E-01 |
| <b>MYOM1</b>  | 4.58  | 1.47E-04 | -0.68 | 7.15E-01 |
| <b>MYOZ1</b>  | 7.16  | 8.33E-08 | -1.55 | 3.00E-01 |
| <b>PC</b>     | 2.65  | 2.97E-02 | -1.48 | 3.27E-01 |
| <b>PGAM2</b>  | 4.03  | 8.17E-04 | -3.34 | 1.86E-02 |
| <b>PTP4A3</b> | 3.22  | 7.21E-03 | -1.85 | 1.97E-01 |
| <b>PYGM</b>   | 7.70  | 3.58E-08 | -1.54 | 3.07E-01 |
| <b>REEP1</b>  | 3.62  | 2.27E-03 | -0.39 | 8.64E-01 |
| <b>SGCA</b>   | 5.81  | 2.67E-06 | -1.80 | 2.10E-01 |
| <b>SGCG</b>   | 7.13  | 3.13E-06 | -0.59 | 7.75E-01 |
| <b>SLN</b>    | 10.30 | 3.13E-06 | -2.26 | 1.23E-01 |
| <b>SOD3</b>   | 4.33  | 2.99E-04 | -1.86 | 1.96E-01 |
| <b>SORBS3</b> | 2.65  | 3.07E-02 | -1.07 | 5.23E-01 |
| <b>TAGLN</b>  | 2.65  | 2.93E-02 | -1.21 | 4.53E-01 |
| <b>TCAP</b>   | 4.78  | 1.26E-04 | -2.42 | 9.06E-02 |
| <b>TEAD4</b>  | 3.72  | 1.63E-03 | -1.68 | 2.50E-01 |
| <b>TNNC1</b>  | 3.78  | 1.35E-03 | -2.96 | 3.35E-02 |
| <b>TNNC2</b>  | 7.85  | 5.04E-09 | -3.55 | 1.02E-02 |
| <b>TNNI1</b>  | 3.93  | 8.40E-04 | -1.94 | 1.70E-01 |
| <b>TNNI2</b>  | 10.02 | 9.07E-11 | -3.27 | 1.95E-02 |
| <b>TNNT1</b>  | 4.53  | 1.36E-04 | -2.61 | 6.21E-02 |
| <b>TNNT2</b>  | 4.19  | 3.91E-04 | -1.85 | 1.95E-01 |
| <b>TNNT3</b>  | 9.85  | 1.92E-11 | -2.13 | 1.23E-01 |
| <b>TPM2</b>   | 3.38  | 4.41E-03 | -2.03 | 1.47E-01 |
